# Supplementary material
Source: PubMed Central journal article supplement (PMC5848506)
Supplement: NIHMS945731-supplement-supplement_1.pdf [file NIHMS945731-supplement-supplement_1.pdf]

## Spinal magnetic resonance imaging studies at presentation

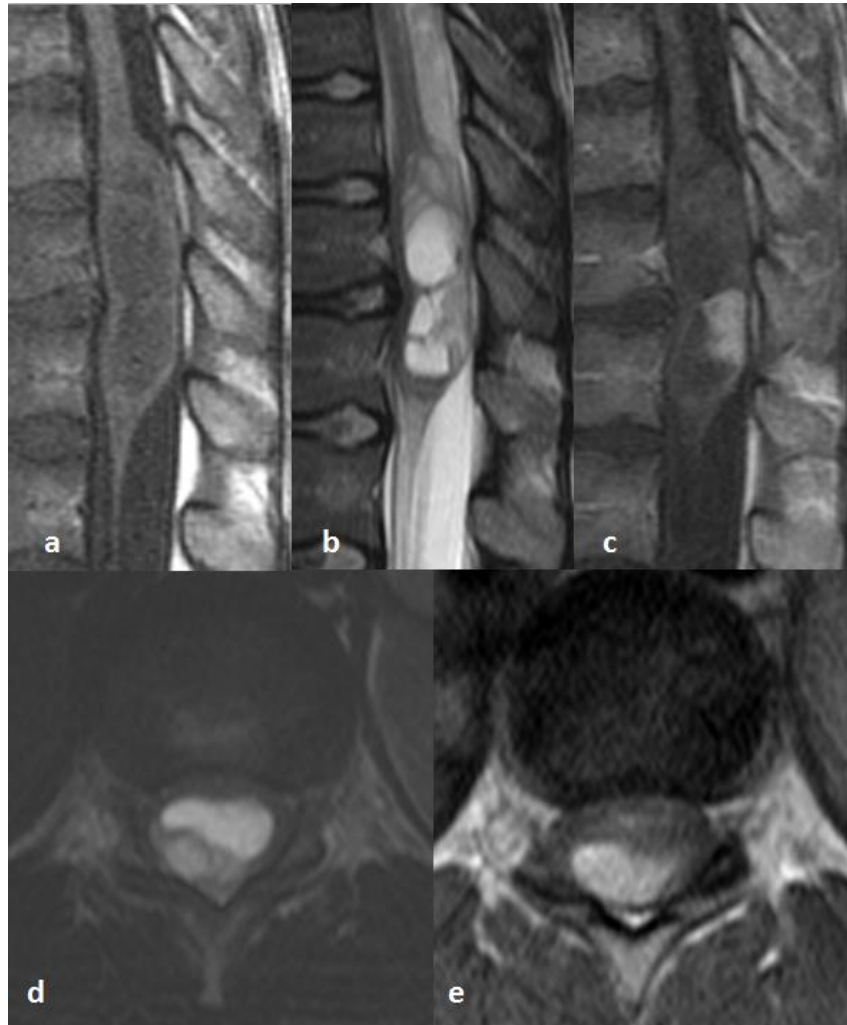

### Case 1.

Sagittal T1 (a), T2 (b) and contrast-enhanced fat-saturated T1 (c); axial fat-saturated T2 (d) and contrast-enhanced T1-weighted (e) images show multi-cystic tumor with peripheral and nodular enhancement, filling and expanding the central canal of the distal spinal cord.

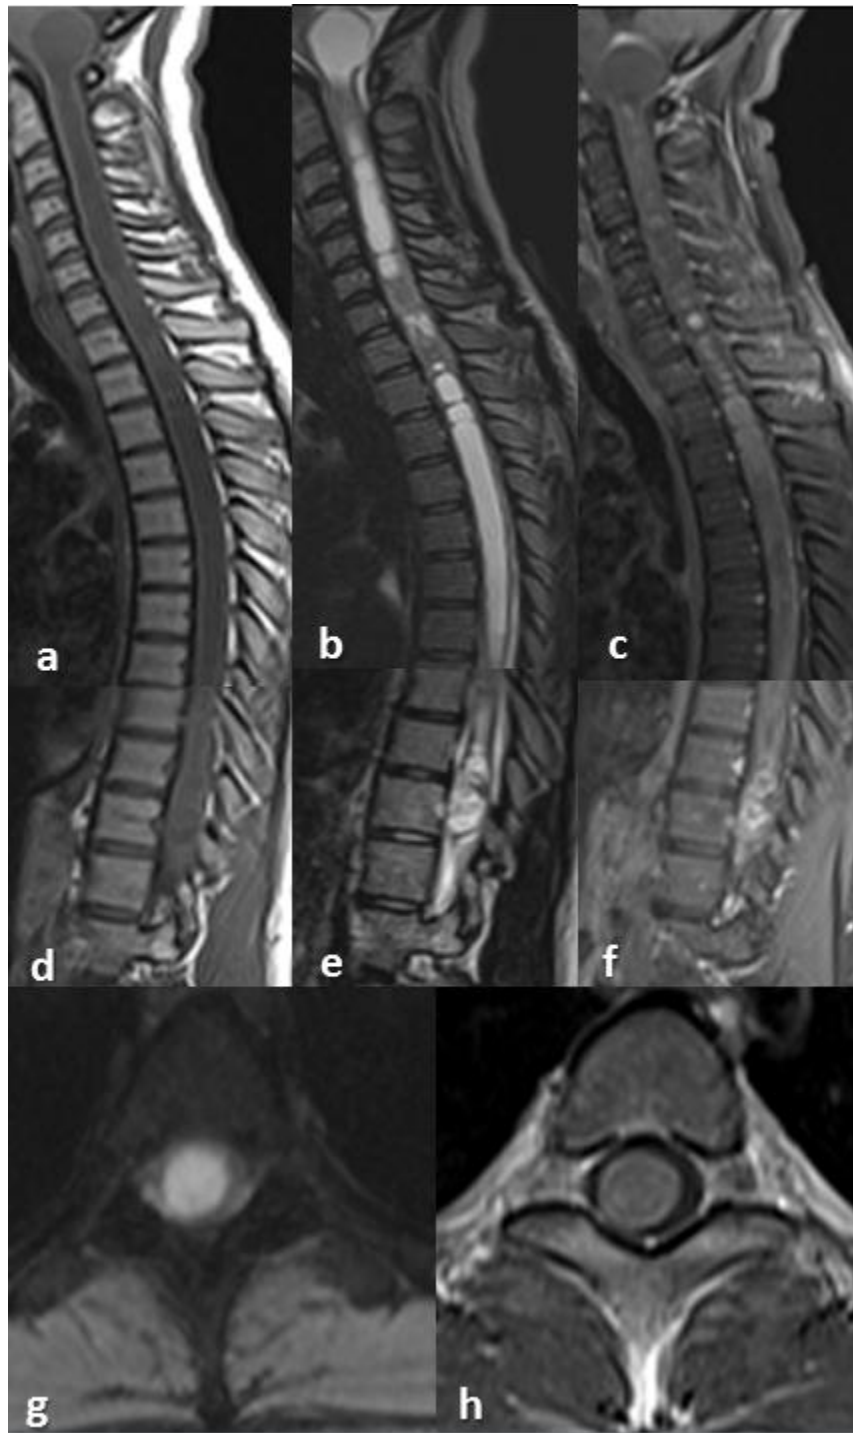

**Case 2.**

Sagittal T1 (a,d), and sagittal fat-saturated T2 (b,e), sagittal fat-saturated contrast-enhanced T1 (c,f), and axial fat-saturated T2 (g) and contrast-enhanced T1-weighted (h) images show multi-cystic tumor with peripheral and nodular enhancement, filling and expanding the central canal of the spinal cord.

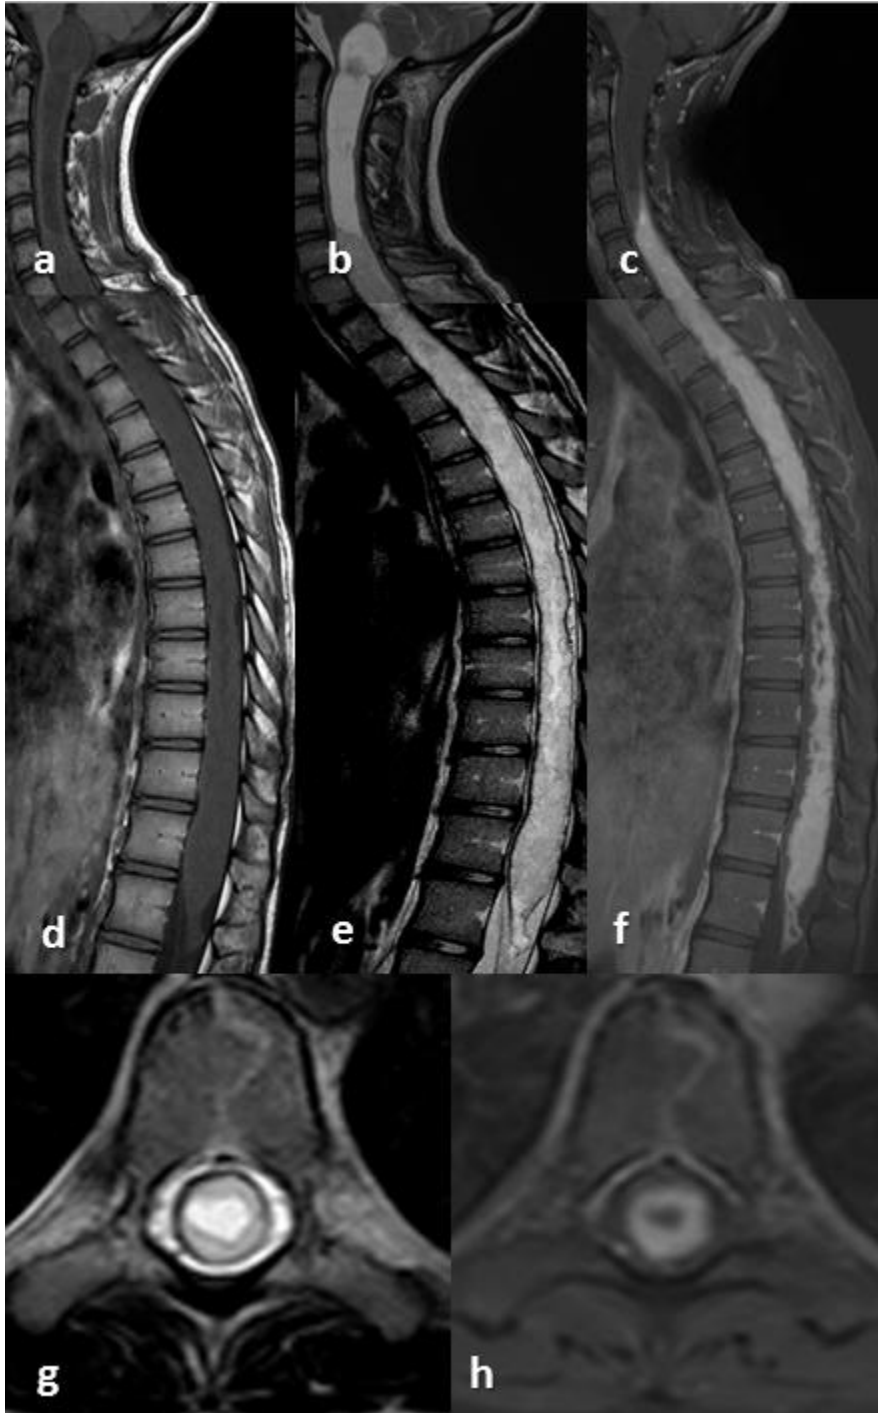

**Case 4.**

Sagittal T1 (a,d), and sagittal fat-saturated T2 (b,e), sagittal fat-saturated contrast-enhanced T1 (c,f), and axial fat-saturated T2 (g) and contrast-enhanced T1-weighted images (h) show T2 hyperintense tumor with predominantly peripheral enhancement filling and expanding the central canal of the spinal cord.

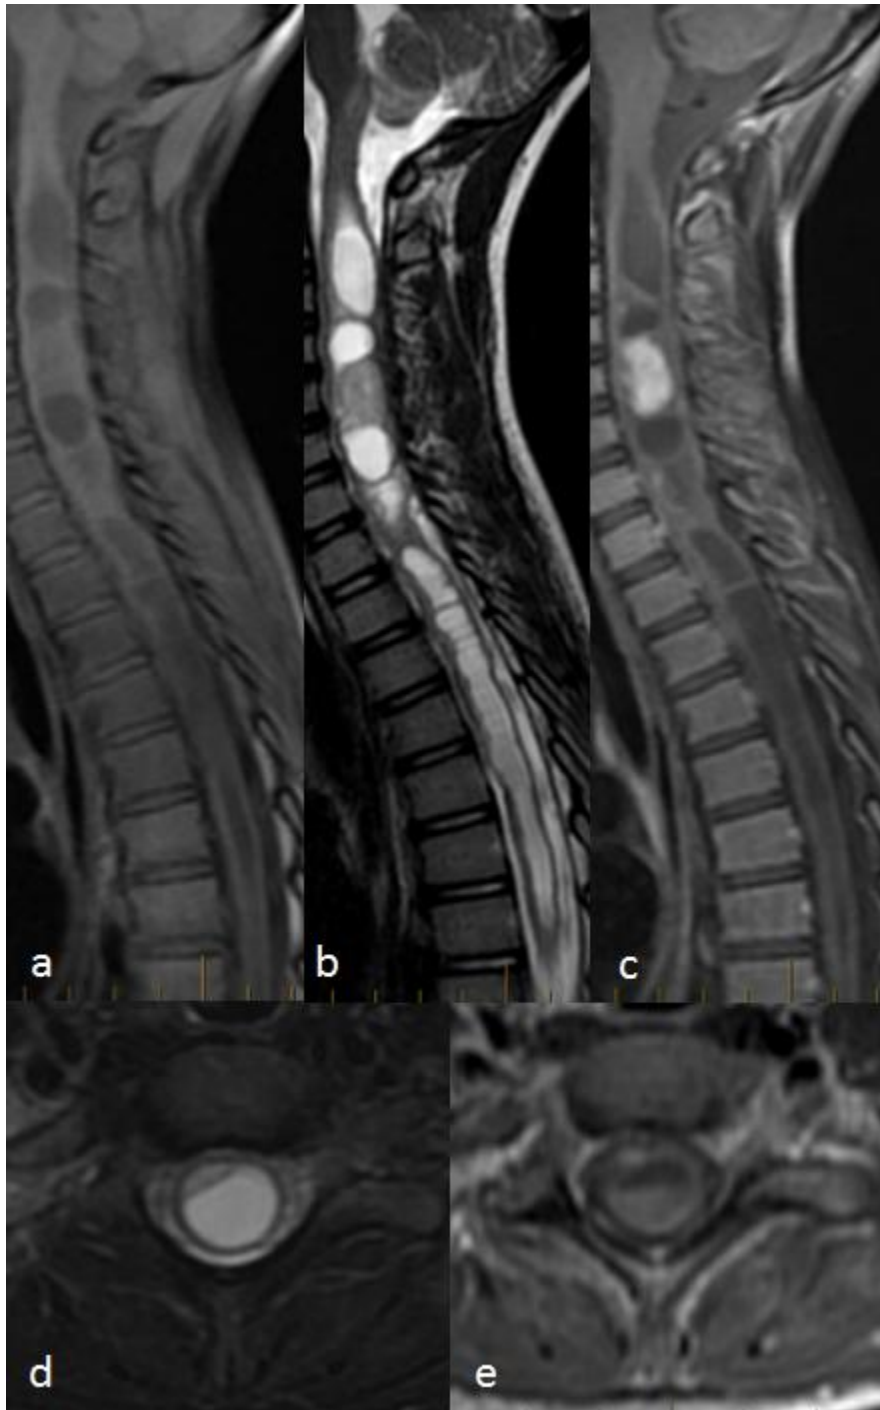

**Case 5.**

(same patient as Figure 1)

Sagittal T1 (a), and sagittal (b,c) and axial (d,e) fat-saturated T2 and contrast-enhanced T1-weighted images show multi-cystic tumor with peripheral and nodular enhancement, filling and expanding the central canal of the spinal cord across multiple spinal segments.
